# Supplementary material
Source: PubMed Central journal article supplement (PMC6400492)

# Supplemental Figure 4. hSSCs generate hematopoiesis-supportive stroma.

**A**
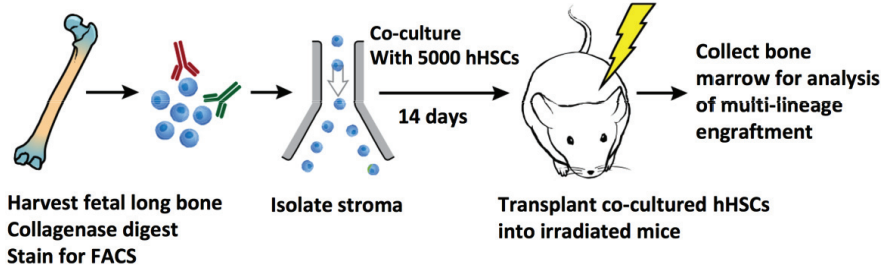
**B Human HSC-derived multilineage xenograft 8-week post-transplant**
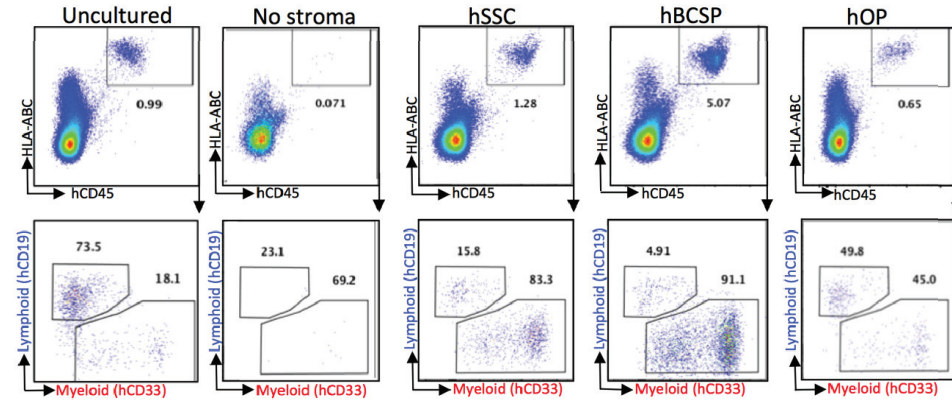
**C**
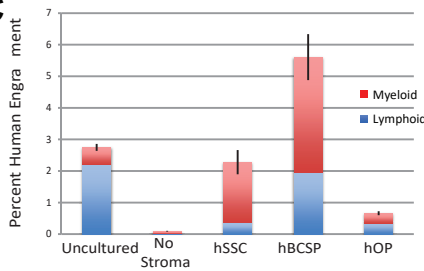
**D**
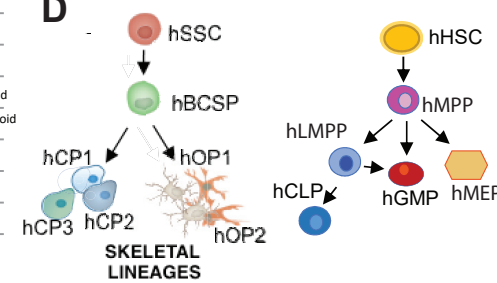
**E**
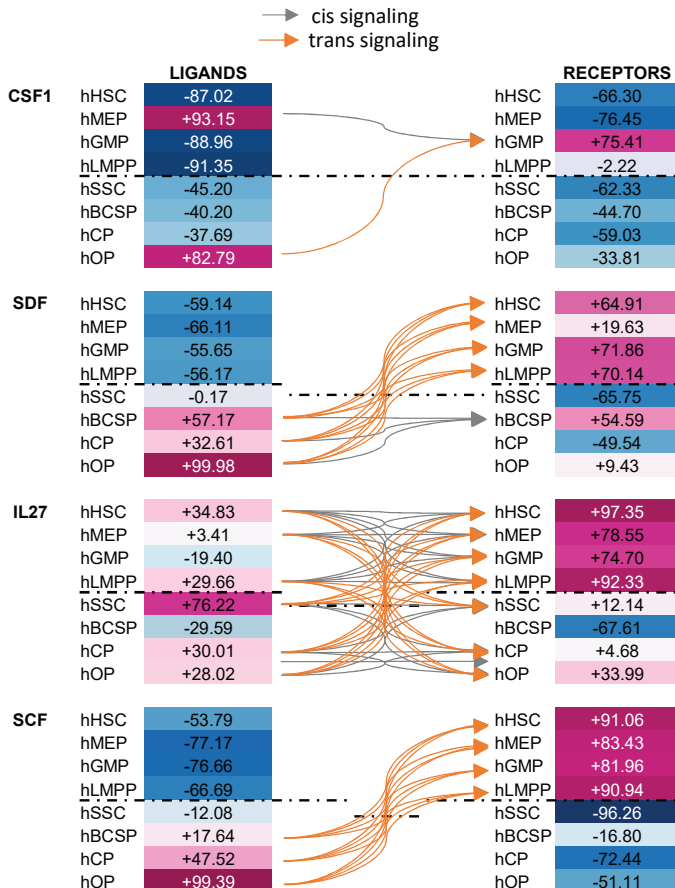
**F**
**i Expression of hematopoietic regulatory factors by human skeletal progenitors**

| Cytokine | Progenitor type (expression level, 0-10) |
|----------|------------------------------------------|
| ANGPT1   | hSSC(5), hBCSP(6), hOP(9)                |
| CSF1     | hOP(8)                                   |
| SDF      | hBCSP(5), hCP(3), hOP(9)                 |
| IL27     | hSSC(7), hCP(3), hOP(2)                  |
| IL7      | hOP(5)                                   |
| SCF      | hBCSP(1), hCP(4), hOP(9)                 |

**ii Expression of skeletal regulatory factors by human hematopoietic progenitors**

| Cytokine | Progenitor type (expression level, 0-10)               |
|----------|--------------------------------------------------------|
| BMP      | hLMPP(4)                                               |
| BMP8     | hLMPP(5), hMEP (8), hGMP(8)                            |
| DH       | hMPP(5), hLMPP(6), hMEP(6), hGMP(5)                    |
| FGF      | hHSC(6), hMPP(3), hCMP(5), hMEP(5), hGMP(7)            |
| WNT      | hHSC(8), hMPP(3), hLMPP(7), hGMP(7), hMEP (3), hGMP(3) |
| WNT      | hHSC(3), hMPP(4), hLMPP(5), hCMP(2), hMEP(6), hGMP(4)  |

1 2 3 4 5 6 7 8 9 10

**G**
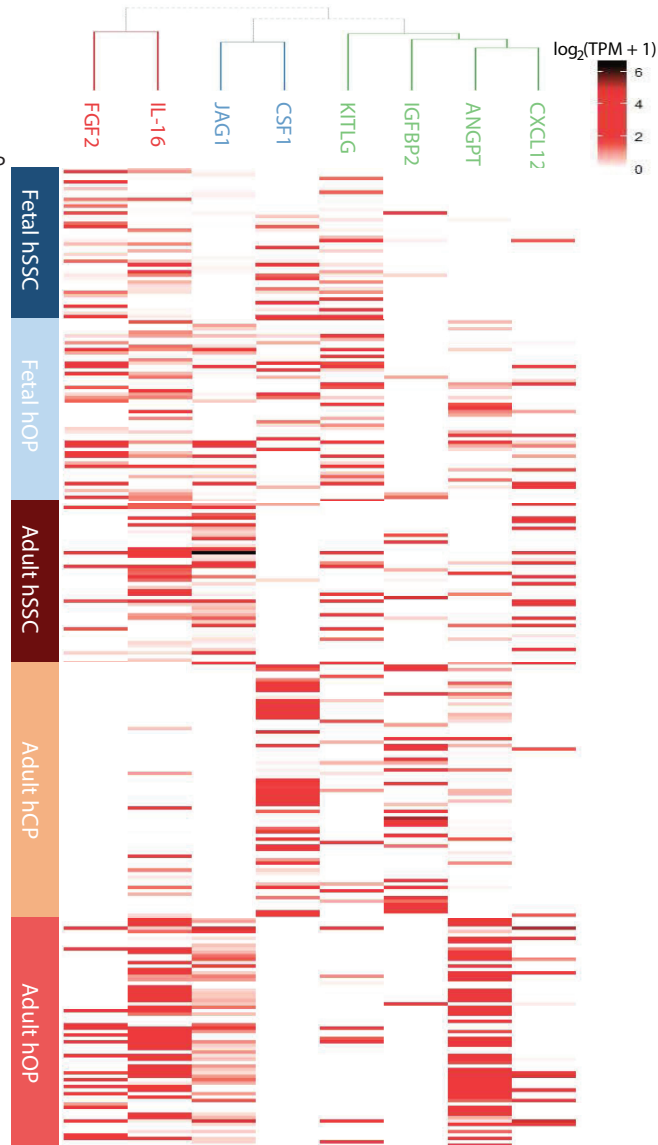

Supplement: NIHMS1505650-supplement-4.pdf [file NIHMS1505650-supplement-4.pdf]
