# Supplementary material
Source: PubMed Central journal article supplement (PMC6400492)

# Supplemental Figure 5. Transcriptionally conserved skeletal pathways between mouse and human SSCs.

**A**

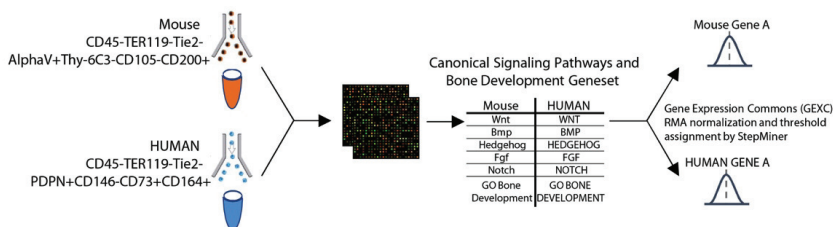

**B**

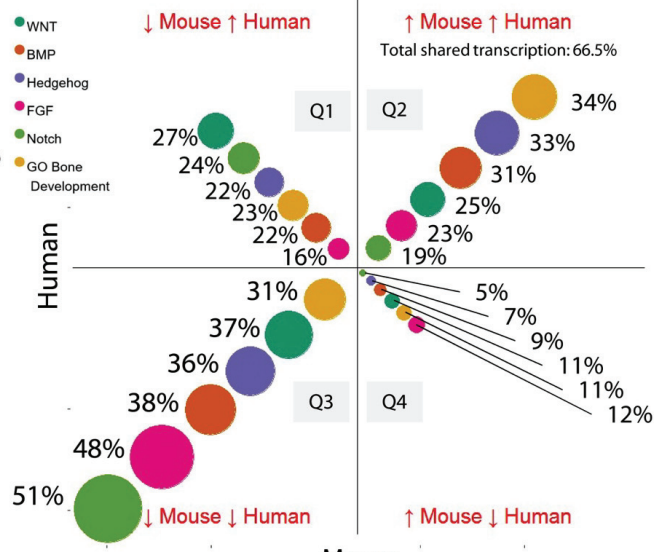

**C**

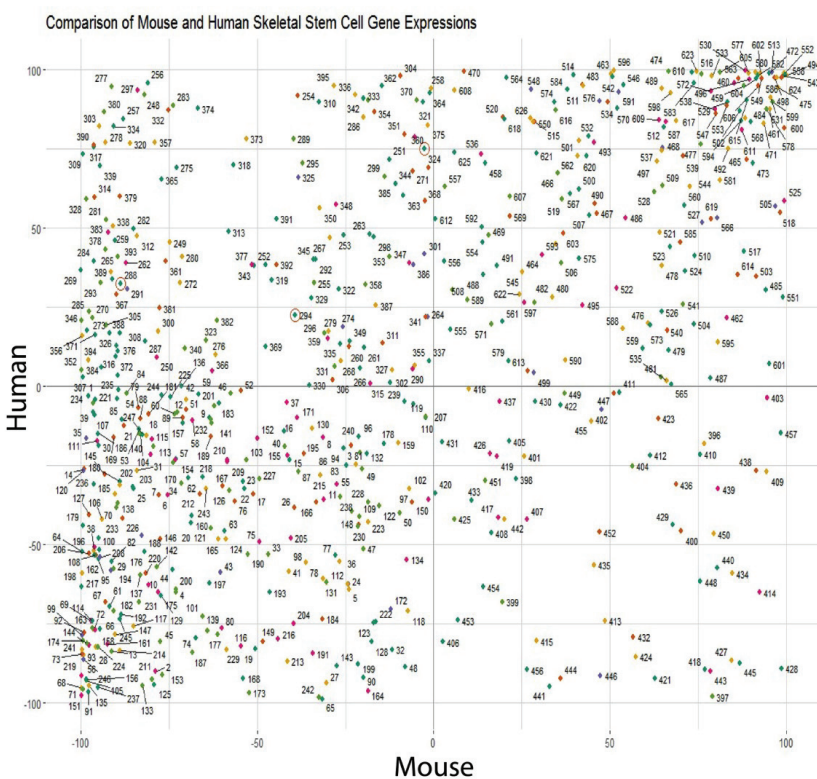

**D**

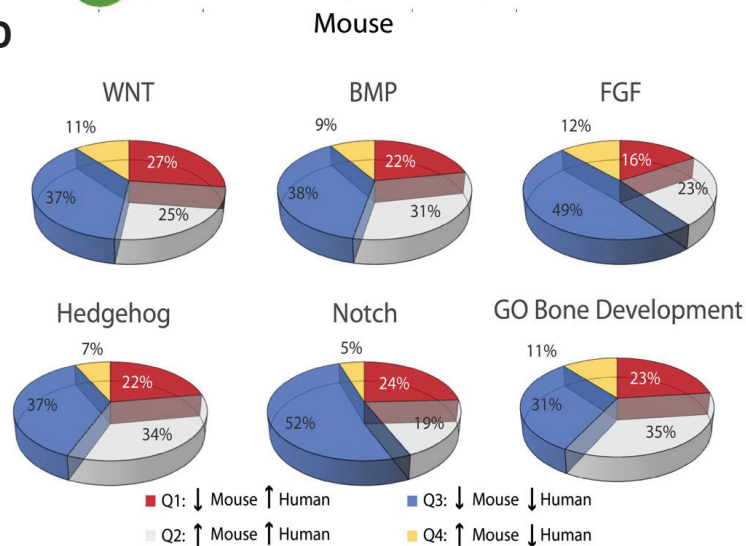

Supplement: NIHMS1505650-supplement-5.pdf [file NIHMS1505650-supplement-5.pdf]
