# Supplementary material
Source: PubMed Central journal article supplement (PMC6400492)

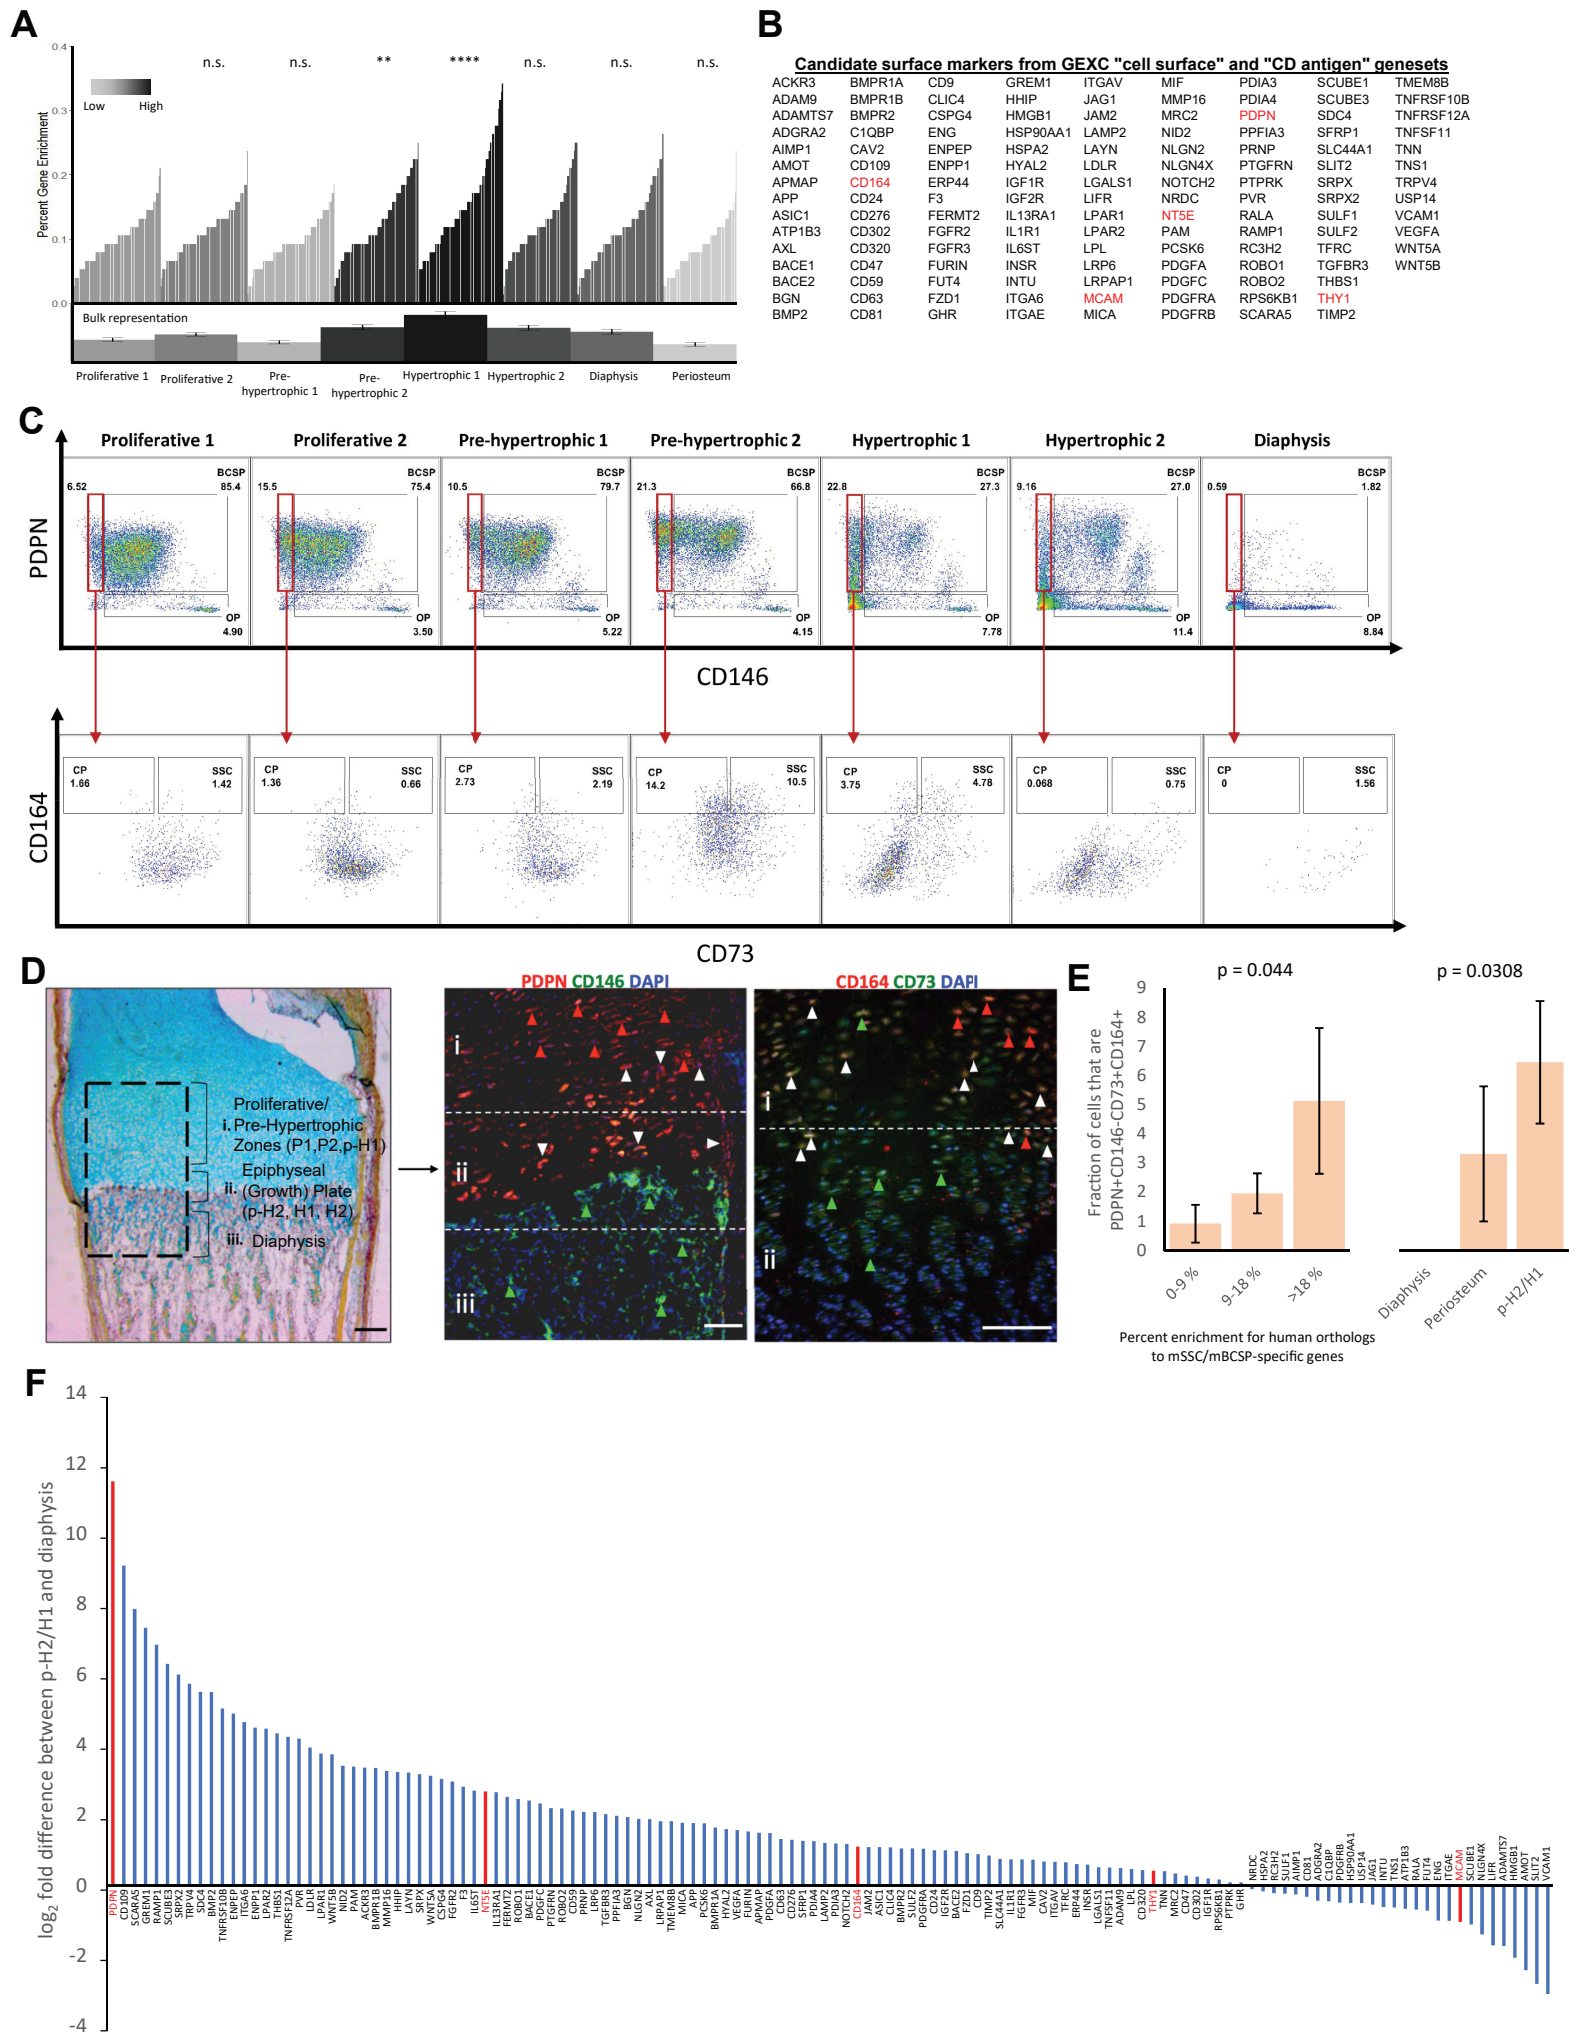

Supplement: NIHMS1505650-supplement-1.pdf [file NIHMS1505650-supplement-1.pdf]

# Supplemental Figure 2. hSSCs self-renew in vivo and generate serial multilineage ossicles.

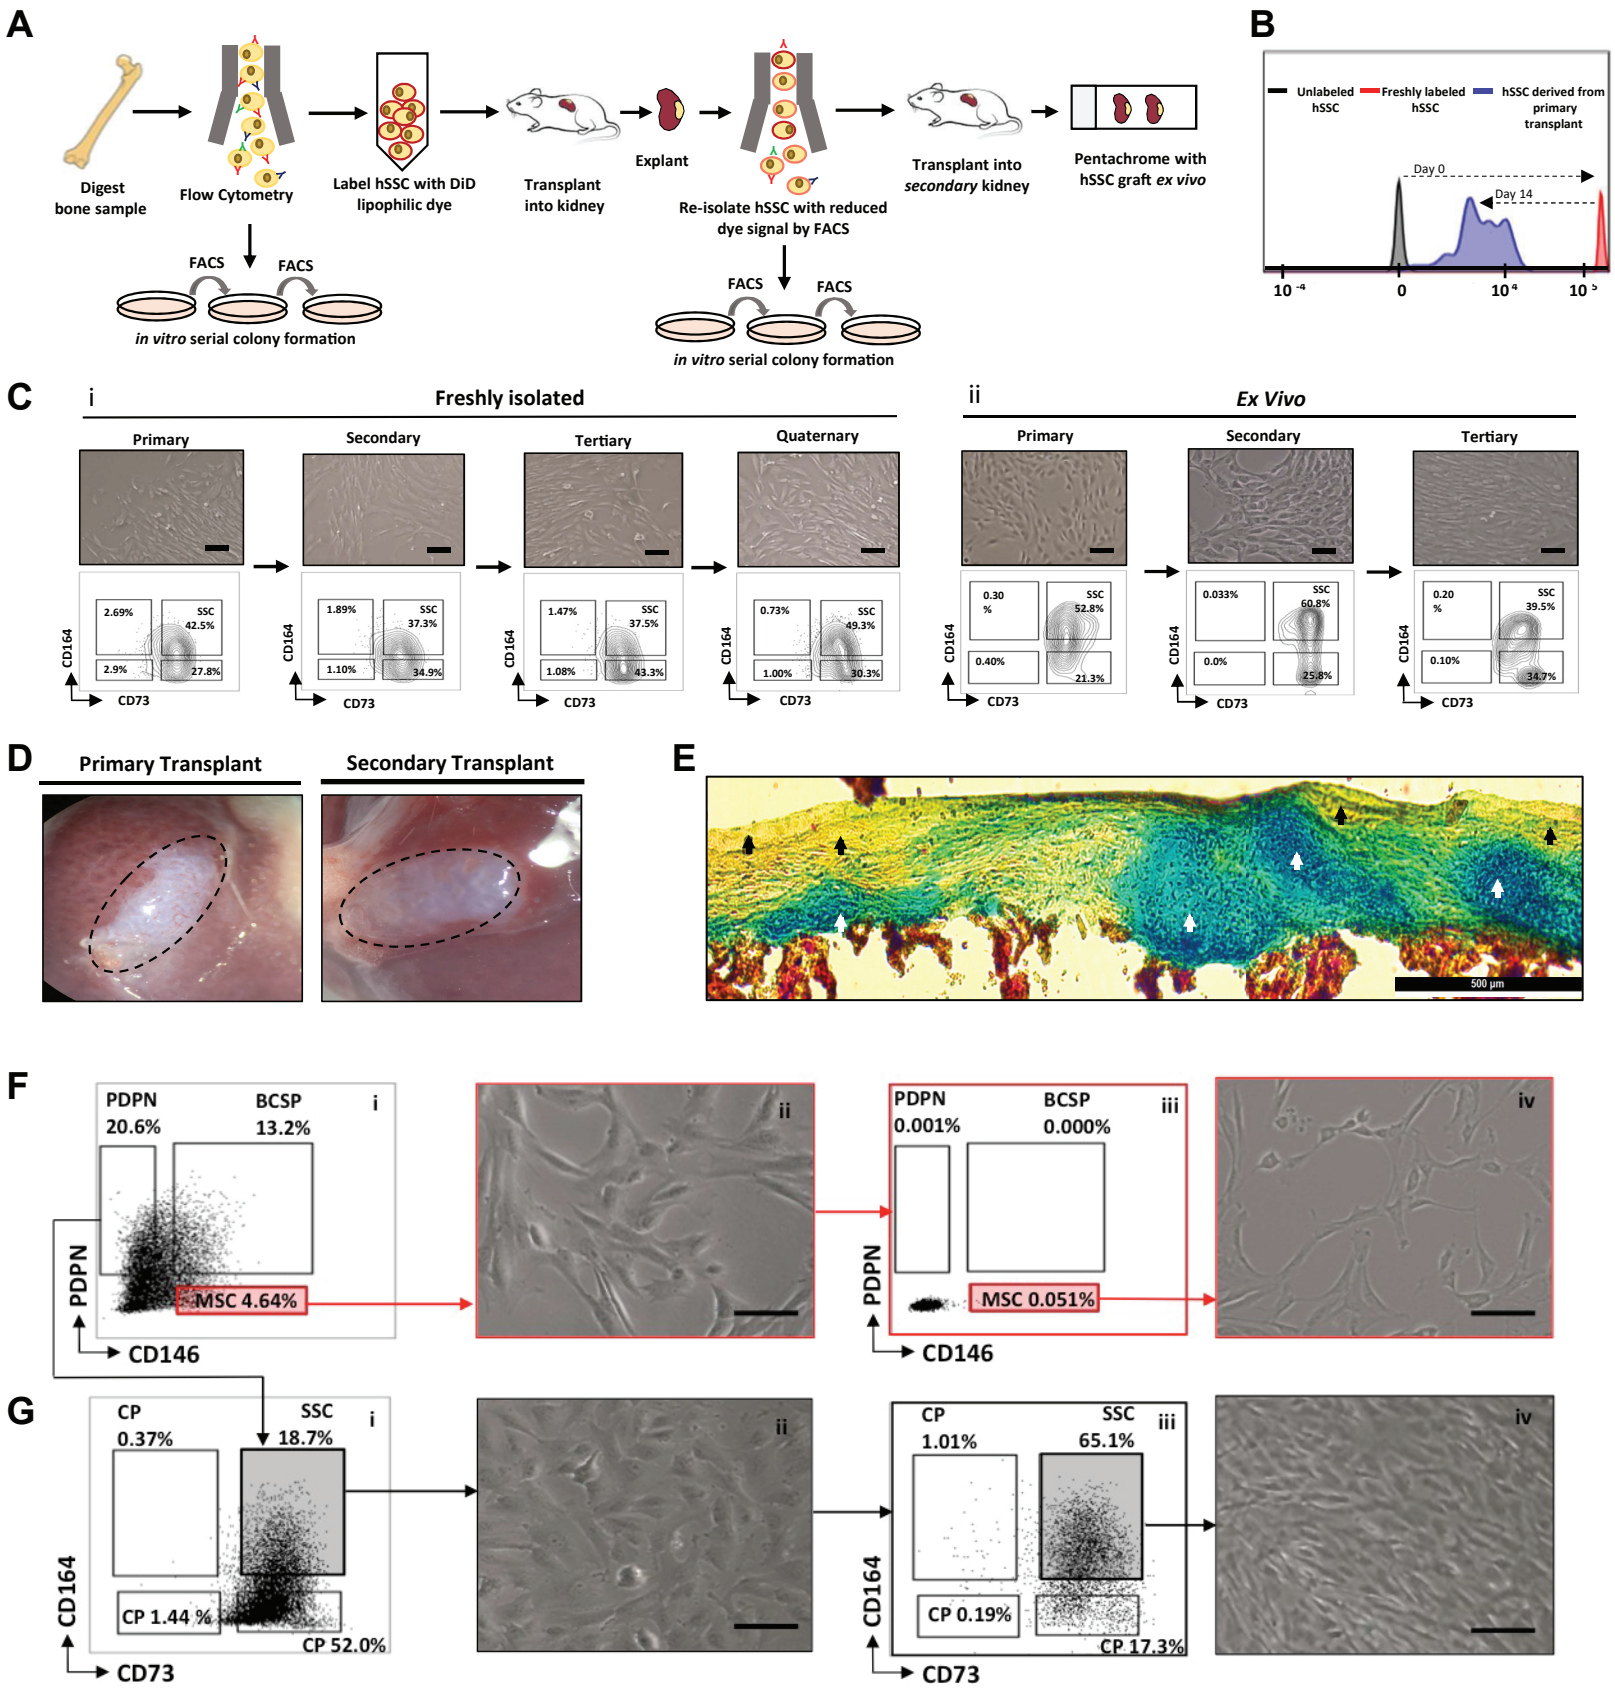

Supplement: NIHMS1505650-supplement-2.pdf [file NIHMS1505650-supplement-2.pdf]

# Supplemental Figure 3. hSSCs do not differentiate into adipocytes.

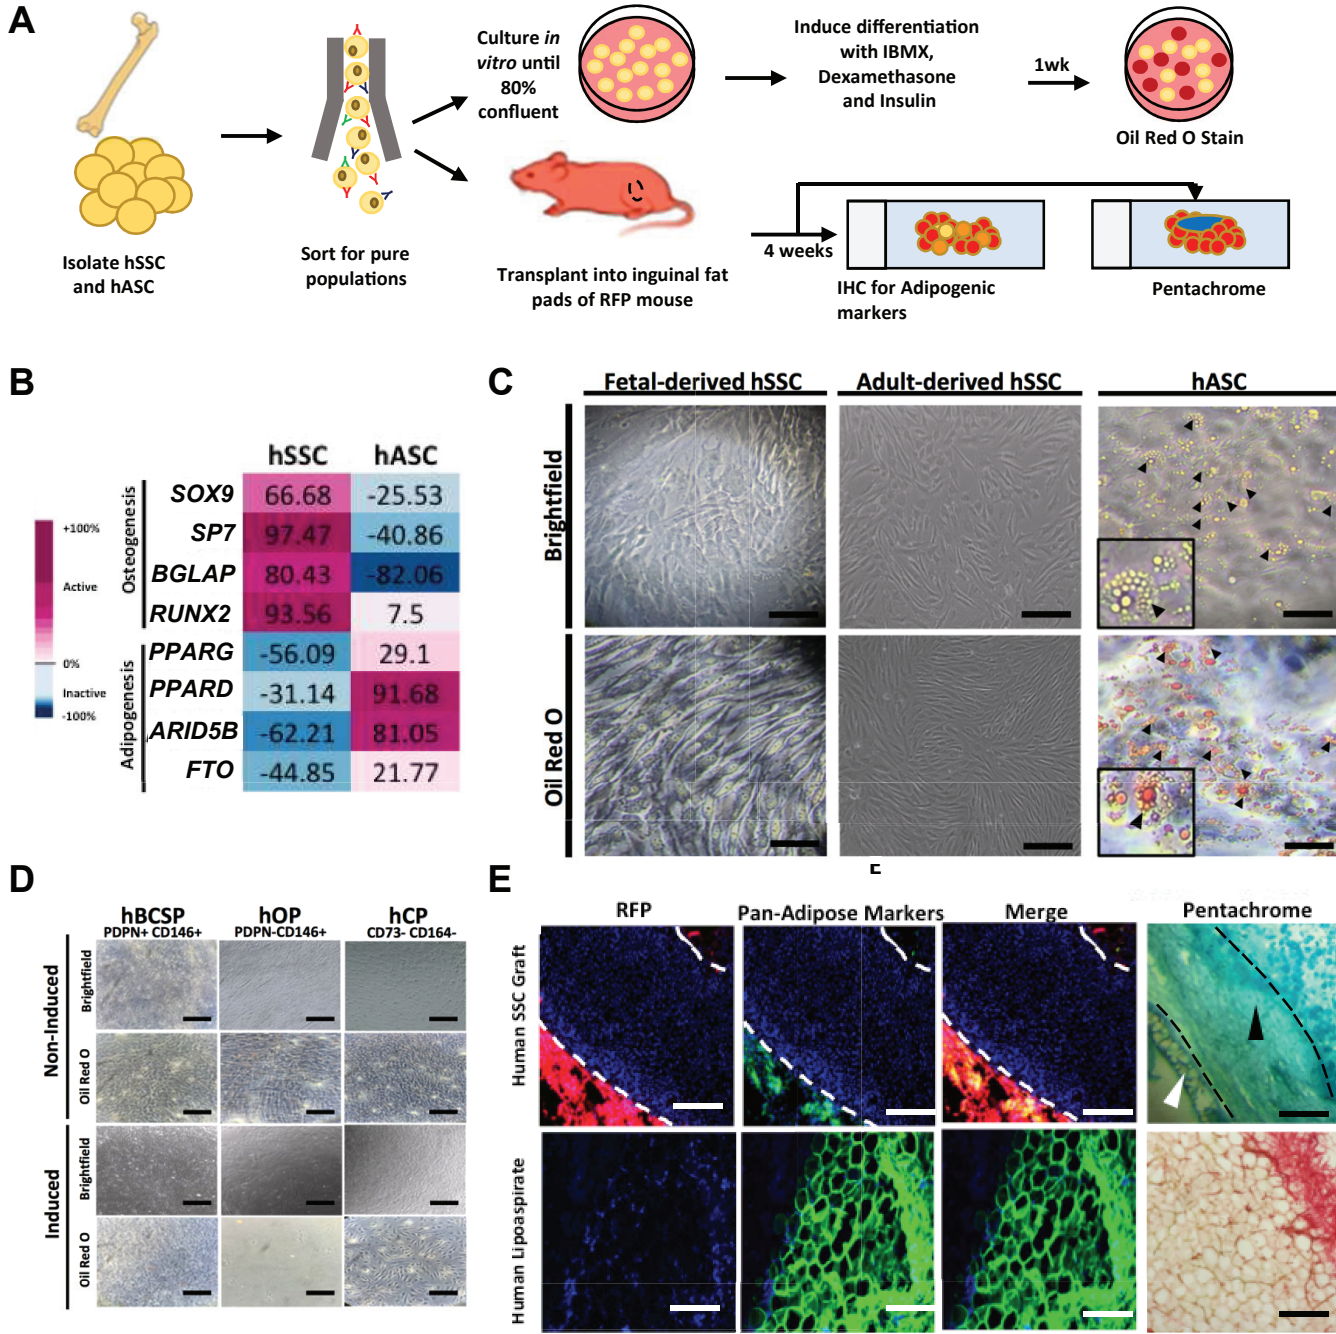

Supplement: NIHMS1505650-supplement-3.pdf [file NIHMS1505650-supplement-3.pdf]

# Supplemental Figure 6. Proximal/distal enhancer motifs in mSSC and hSSC.

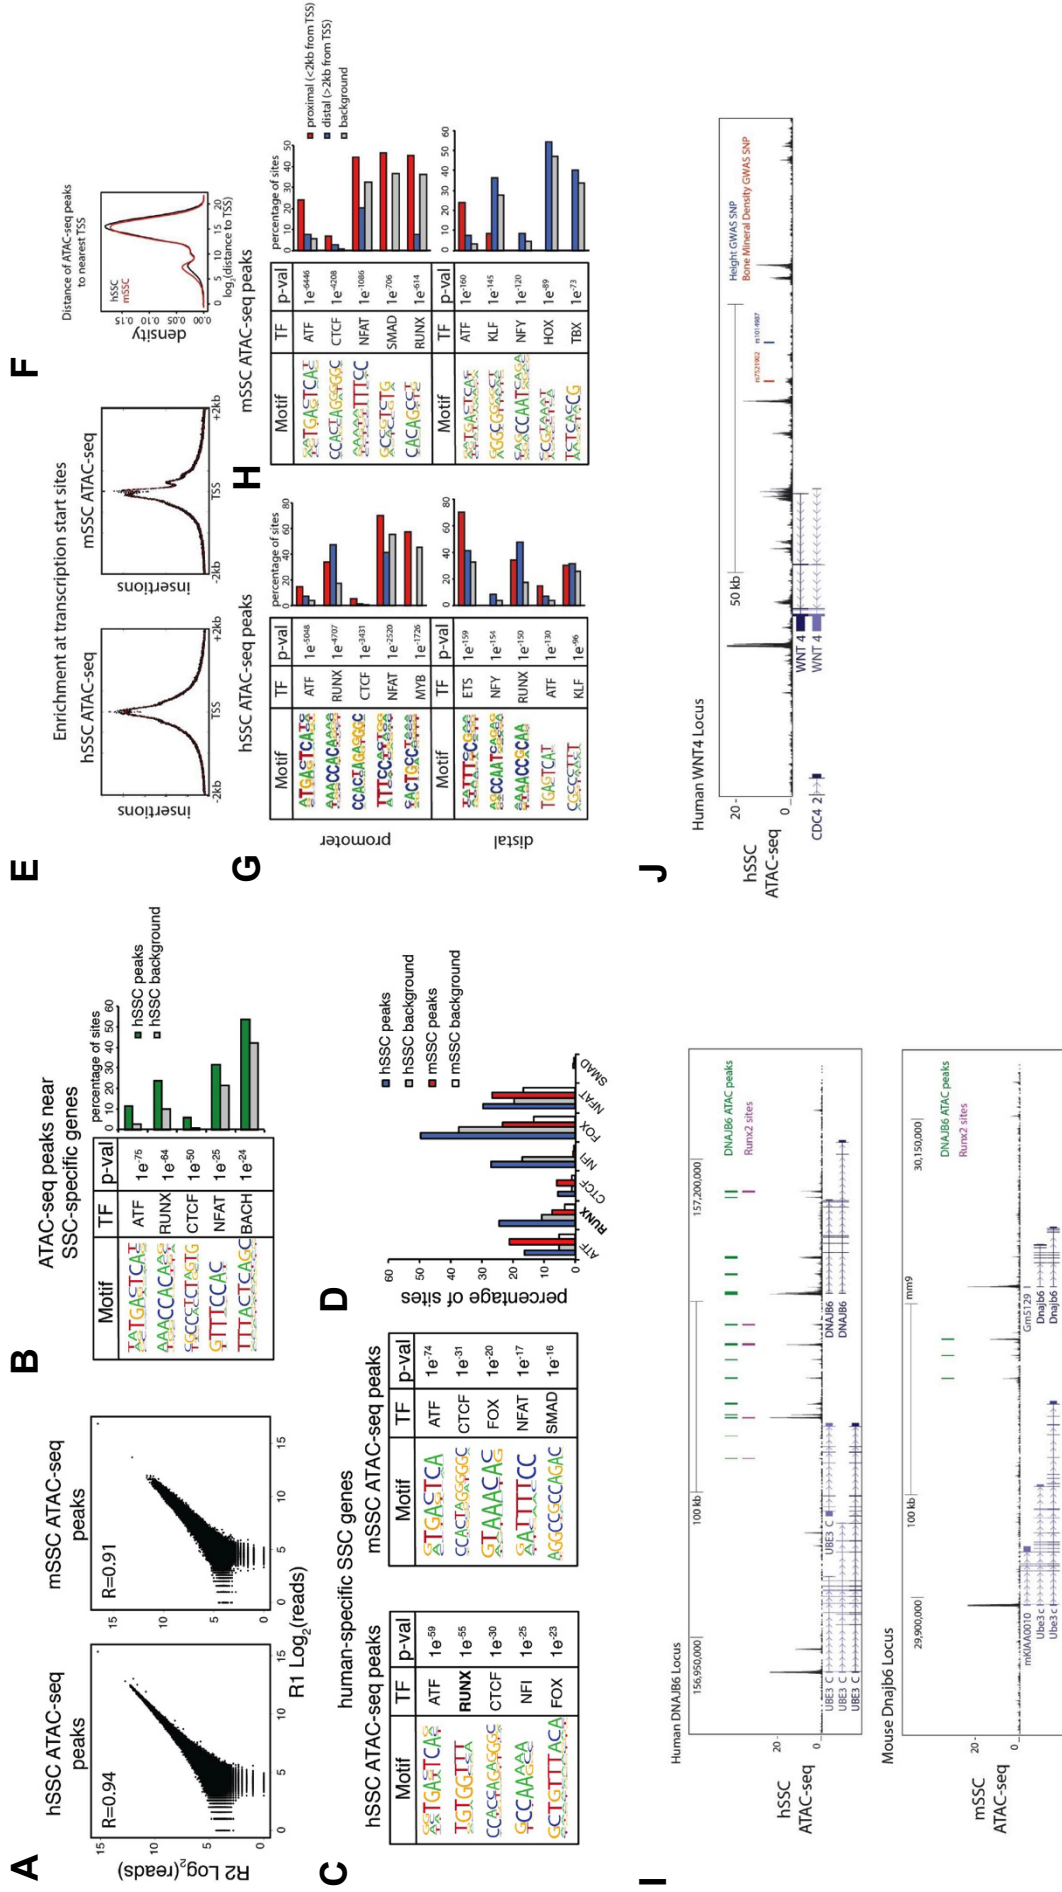

Supplement: NIHMS1505650-supplement-6.pdf [file NIHMS1505650-supplement-6.pdf]
